# Supplementary material for: The Assessment of a Multifactorial Score for the Adaptability Evaluation of Six Poultry Genotypes to the Organic System
Source: MDPI journal article supplement (doi:10.3390/ani11102992), 2021-10-18
Supplement: s1 [file s1]

## Supplementary material

Table S1. Ingredients (%) and chemical composition of the three experimental diets

| Ingredients (%)               |         | Starter  | Grower   | Finisher |
|-------------------------------|---------|----------|----------|----------|
| Corn                          |         | 53.92    | 55.95    | 53.11    |
| Soybean flour extract 48%     |         | 30.23    | 24.67    | 15.69    |
| Extruded corn flour           |         | 5.08     | 8.90     | 11.45    |
| Common wheat                  |         | 5.00     | 5.00     | 15.00    |
| Dicalcium phosphate           |         | 1.71     | 1.58     | 1.21     |
| Calcium carbonate             |         | 1.23     | 1.16     | 1.29     |
| Corn gluten 70                |         | 1.00     | 1.00     |          |
| Soybean oil                   |         | 0.62     | 0.54     | 1.15     |
| Vitamin supplement            |         | 0.40     | 0.40     | 0.40     |
| salt                          |         | 0.20     | 0.18     | 0.23     |
| Mineral supplement            |         | 0.16     | 0.16     | 0.11     |
| Sodium bicarbonate            |         | 0.15     | 0.15     | 0.15     |
| Chemical composition (% s.s.) |         |          |          |          |
| Humidity                      | %       | 12.20    | 12.11    | 12.00    |
| Crude protein                 | %       | 24.01    | 22.16    | 18.41    |
| Lipids                        | %       | 3.99     | 3.98     | 4.55     |
| Crude fiber                   | %       | 3.48     | 3.58     | 3.60     |
| Ashes                         | %       | 6.92     | 6.43     | 5.78     |
| Metabolizable energy          | kcal/kg | 3245.20  | 3242.64  | 3295.94  |
| VIT A                         | U.I.    | 11385.93 | 11377.59 | 11364.80 |
| VIT E                         | Mg      | 36.43    | 36.4     | 36.37    |
